# Supplementary material
Source: PubMed Central journal article supplement (PMC11248888)
Supplement: 10-1055-a-1718-3132-2021-02-1351.pdf [file 10-1055-a-1718-3132-2021-02-1351.pdf]

Zusatzmaterial  
**Fragebogen zum Tätigkeitsfeld von Physician Assistants B.Sc.**

## Übersicht

- 1. Persönliche Angaben**
- 2. Schulische- und berufliche Abschlüsse vor Studienbeginn**
- 3. Angaben zum Studium**
- 4. Anschließende Berufstätigkeit**
- 5. Angaben zum aktuellen Arbeitsplatz**
  - 5.1 Angaben zur Einrichtung*
  - 5.2 Angaben zur Vergütung*
  - 5.3 Angaben zur Arbeitszeit*
  - 5.4 Beschreibung der zu verrichtenden Tätigkeiten*
- 6. Messung der Zufriedenheit**

## 1. Persönliche Daten

Alter \_\_\_\_\_ Jahre

Geschlecht  M  W

## 2. Schulische und berufliche Abschlüsse vor Beginn des Studiums

Höchster Schulabschluss \_\_\_\_\_

Berufliche Abschlüsse \_\_\_\_\_

\_\_\_\_\_

\_\_\_\_\_

## 3. Angaben zum Studium

|                                                                | Ja | Nein |
|----------------------------------------------------------------|----|------|
| Haben Sie ihr Studium in der Regelstudienzeit beendet?         |    |      |
| Wenn nein, wie lange haben Sie studiert? (Angabe in Semestern) |    |      |

## 4. Anschließende Berufstätigkeit

|                                                                        | Ja | Nein |
|------------------------------------------------------------------------|----|------|
| Hatten Sie unmittelbar nach dem Studium den Wunsch als PA zu arbeiten? |    |      |
| Hatten Sie Probleme eine Anstellung als PA zu finden?                  |    |      |
| Wenn ja, welche?                                                       |    |      |

## 5. Angaben zum aktuellen Arbeitsplatz

|                                                                      | Ja | Nein |
|----------------------------------------------------------------------|----|------|
| Sind Sie aktuell Berufstätig                                         |    |      |
| Wenn nein, was ist der Grund? (z.B. Elternzeit, auf Job-Suche, etc.) |    |      |
| Wenn ja, wie lautet Ihre aktuelle Stellenbezeichnung?                |    |      |

### 5.1 Angaben zur Einrichtung

Sie arbeiten in

|                            |  |
|----------------------------|--|
| einem Krankenhaus          |  |
| einer Hausarztpraxis       |  |
| einer Facharztpraxis       |  |
| Sonstige (bitte benennen): |  |

Bei einer Tätigkeit in einem Krankenhaus:

Über wie viele Betten verfügt die gesamte Einrichtung? \_\_\_\_\_

Bei einer Tätigkeit in der Praxis:

Wie viele Ärzte gibt es? \_\_\_\_\_

Seit wann sind Sie in der Einrichtung beschäftigt? \_\_\_\_\_

|                                                                                       | Ja | Nein |
|---------------------------------------------------------------------------------------|----|------|
| Sind Sie seit Beginn Ihrer Tätigkeit in der aktuellen Einrichtung als PA eingestellt? |    |      |
| Wenn nein, seit wann arbeiten Sie dort als PA?                                        |    |      |
| In welcher Abteilung sind Sie beschäftigt?                                            |    |      |

|                                                                                                                                                                                                                           |           |             |
|---------------------------------------------------------------------------------------------------------------------------------------------------------------------------------------------------------------------------|-----------|-------------|
| Seit wann sind Sie in dieser Abteilung beschäftigt?                                                                                                                                                                       |           |             |
| Wem sind Sie dienstrechtlich unterstellt? <i>(bitte geben Sie eine Berufsbezeichnung an)</i>                                                                                                                              |           |             |
| Arbeiten Sie in Vollzeit                                                                                                                                                                                                  | <b>Ja</b> | <b>Nein</b> |
|                                                                                                                                                                                                                           |           |             |
| Wenn nein, wie viele Stunden arbeiten Sie durchschnittlich in der Woche?                                                                                                                                                  |           |             |
| Eine Vollzeitstelle umfasst wie viele Stunden pro Woche? (z.B. 39h/Wo)?                                                                                                                                                   |           |             |
| Gibt es unterschiedliche Arbeitsplätze innerhalb Ihrer Abteilung, an denen Sie als PA eingesetzt werden?<br><i>(z.B. Anstellung in der Gefäßchirurgie: Einsatz im Stationsdienst, Operationssaal und in der Aufnahme)</i> |           |             |

## 5.2 Angaben zur Vergütung

|                                                                                                        | <b>Ja</b> | <b>Nein</b> | <b>„Ich weiß es nicht“</b> |
|--------------------------------------------------------------------------------------------------------|-----------|-------------|----------------------------|
| Gibt es eine offizielle Stellenbeschreibung für Physician Assistants in Ihrer Einrichtung / Abteilung? |           |             |                            |
| Gibt es in Ihrer Einrichtung einen einheitlichen Tarif für Physician Assistants?                       |           |             |                            |
| Welchem Bereich ist Ihre Stelle zugeordnet <i>(z.B. ärztlicher Dienst, pflegerischer Dienst)</i>       |           |             |                            |

Wie ist Ihr Jahresbruttolohn inkl. fester Zuwendungen (z.B. Urlaubsgeld) \_\_\_\_\_ €

|                                                                           | <b>Ja</b> | <b>Nein</b> |
|---------------------------------------------------------------------------|-----------|-------------|
| Erhalten Sie weitere Zuwendungen, z.B. Schichtzulagen oder Dienstzulagen? |           |             |

Wenn Ja, um welche Zuwendungen handelt es sich und können Sie etwa abschätzen, um wie viel es sich dabei monatlich handelt? (brutto)

### 5.3 Angaben zur Arbeitszeit

|                                                                                 | Ja | Nein |
|---------------------------------------------------------------------------------|----|------|
| Gibt es ein festes Arbeitszeitmodell für Ihre Stelle?                           |    |      |
| Arbeiten Sie regelmäßig im Schichtdienst?                                       |    |      |
| Arbeiten Sie regelmäßig an Wochenenden?                                         |    |      |
| Arbeiten Sie regelmäßig an Feiertagen?                                          |    |      |
| Arbeiten Sie regelmäßig nachts?                                                 |    |      |
| Sind Sie im Bereitschaftsdienst eingesetzt?                                     |    |      |
| Wenn Sie im Schichtdienst arbeiten, bitte erläutern Sie Ihr Schichtmodell kurz: |    |      |

### 5.4 Beschreibung der zu verrichtenden Tätigkeiten

An dieser Stelle soll eine möglichst vollständige Beschreibung Ihrer Tätigkeiten entstehen. Auch Tätigkeiten, die für Sie belanglos erscheinen sind hier wichtig und sollen unbedingt benannt werden. Um es Ihnen etwas einfacher zu machen, ist eine übergeordnete Gliederung in unterschiedliche Aufgabenfelder vorbereitet. Wenn Sie in bestimmten Bereichen keine Aufgaben übernehmen, streichen Sie bitte die Spalte. Aber auch Tätigkeiten, an denen Sie als Teil eines Teams mitwirken sind hier von Interesse. Übernehmen Sie z.B. einzelne untergeordnete Tätigkeiten, um beispielsweise einen Therapieplan zu erstellen, dann benennen sie diese Tätigkeit. Sie können auch ein separates Blatt beifügen oder eine eigene Unterteilung erstellen, wenn Ihnen diese sinnvoller erscheint. Bitte versuchen Sie möglichst jede auch noch so unwichtig erscheinende Tätigkeit aufzuführen. Wenn Sie sich nicht sicher sind, wie Sie einzelne Tätigkeiten zuordnen, ist das nicht schlimm. Es geht primär darum, möglichst alle Tätigkeiten zu erfassen.

Vielleicht haben Sie die Zeit und können den Fragebogen nach dem Ausfüllen für ein bis zwei Tage bei Seite legen. Nehmen Sie sich danach insbesondere diesen Teil noch einmal zur Hand, vielleicht fällt Ihnen noch etwas ein, oder Sie haben während der Arbeitszeit bemerkt, dass Ihr Aufgabenspektrum noch viel mehr umfasst, als Sie bisher aufgeschrieben haben

- **Administrative Tätigkeiten**

*(z.B. Entlassungsbriefe schreiben, Befunde anfordern, häusliche Versorgung veranlassen, etc.)*

- **Medizinische Tätigkeiten**

*(z.B. Blutabnahmen, Pleura-Punktionen, Verbandwechsel, Assistenzen im OP, Endoskopien, Sonografien, körperliche Untersuchungen, etc.)*

- **Aufgaben im wissenschaftlichen Bereich**  
(z.B. *statistische Arbeiten, Publikationen, etc.*)

- **Sonstige Aufgaben**  
(z.B. *Angehörigengespräche, Dienstplangestaltung, Einstellungsverfahren, Lehrtätigkeiten, etc.*)

## 6. Zufriedenheit

In diesem Kapitel möchten wir messen, wie zufrieden sie in Ihrer Position als Physician Assistant sind und wie Sie sich in Ihrer Rolle fühlen.

Arbeiten Sie aktuell als PA ja/nein, falls nein, dann.....

Wenn Sie aktuell nicht als PA beschäftigt sind, brauchen Sie die folgenden Fragen nicht beantworten.

Meine Rolle als Physician Assistant ist mir völlig klar

trifft voll zu

trifft überwiegend zu

trifft wenig zu

trifft gar nicht zu

Ich glaube, dass meinen Kollegen und Kolleginnen meine Rolle völlig klar ist

trifft voll zu

trifft überwiegend zu

trifft wenig zu

trifft gar nicht zu

Ich fühle mich von meinen ärztlichen Kollegen und Kolleginnen wertgeschätzt

trifft voll zu

trifft überwiegend zu

trifft wenig zu

trifft gar nicht zu

Ich fühle mich von meinen pflegerischen Kollegen und Kolleginnen wertgeschätzt

trifft voll zu

trifft überwiegend zu

trifft wenig zu

trifft gar nicht zu

Ich würde das Studium jederzeit wieder machen

trifft voll zu

trifft überwiegend zu

trifft wenig zu

trifft gar nicht zu



Auf einer Skala von 1 – 10 möchten wir abschließend messen, wie zufrieden sind Sie mit Ihren Tätigkeiten insgesamt sind. Kreuzen Sie 1 an, sind Sie gar nicht zufrieden, wählen Sie eine 10, sind Sie sehr zufrieden. Bitte denken Sie ausschließlich an Ihre auszuführenden Tätigkeiten und lassen Ihr Verhältnis zu Kollegen/innen oder Vorgesetzten, sowie andere Aspekte an dieser Stelle außer Acht.

| <b>Gar nicht<br/>zufrieden</b> |          |          |          |          |          |          |          |          |           | <b>Höchst<br/>zufrieden</b> |
|--------------------------------|----------|----------|----------|----------|----------|----------|----------|----------|-----------|-----------------------------|
| <b>1</b>                       | <b>2</b> | <b>3</b> | <b>4</b> | <b>5</b> | <b>6</b> | <b>7</b> | <b>8</b> | <b>9</b> | <b>10</b> |                             |
|                                |          |          |          |          |          |          |          |          |           |                             |

## Zusatzmaterial

**PERSÖNLICHE DATEN**

Alter der befragten Person:

Fachabteilung:

Position auf der  
Station / in der  
Praxis:

Art der Einrichtung:

- Krankenhaus  
 Arztpraxis

Anzahl der Jahre,  
die bereits mit  
einem PA  
gearbeitet wird:**ORGANISATORISCHE ANGABEN**

Wer delegiert in Ihrer Einrichtung an den PA?

|                                 | <i>Trifft voll und ganz zu</i> | <i>Trifft überwiegend zu</i> | <i>Trifft wenig zu</i>   | <i>Trifft gar nicht zu</i> |
|---------------------------------|--------------------------------|------------------------------|--------------------------|----------------------------|
| Nur ich                         | <input type="checkbox"/>       | <input type="checkbox"/>     | <input type="checkbox"/> | <input type="checkbox"/>   |
| Alle Ärztinnen und Ärzte        | <input type="checkbox"/>       | <input type="checkbox"/>     | <input type="checkbox"/> | <input type="checkbox"/>   |
| Nur Fachärztinnen und Fachärzte | <input type="checkbox"/>       | <input type="checkbox"/>     | <input type="checkbox"/> | <input type="checkbox"/>   |
| Sonstige<br>Wenn ja, wer?       | <input type="checkbox"/>       | <input type="checkbox"/>     | <input type="checkbox"/> | <input type="checkbox"/>   |

Wie erfolgt die Delegation in Ihrer Einrichtung?

|                                                    | <i>Trifft voll und ganz zu</i> | <i>Trifft überwiegend zu</i> | <i>Trifft wenig zu</i>   | <i>Trifft gar nicht zu</i> |
|----------------------------------------------------|--------------------------------|------------------------------|--------------------------|----------------------------|
| Direkt und individuell vor der delegierten Aufgabe | <input type="checkbox"/>       | <input type="checkbox"/>     | <input type="checkbox"/> | <input type="checkbox"/>   |

|                                                       |                          |                          |                          |                          |
|-------------------------------------------------------|--------------------------|--------------------------|--------------------------|--------------------------|
| Durch einen Handlungskatalog festgelegt               | <input type="checkbox"/> | <input type="checkbox"/> | <input type="checkbox"/> | <input type="checkbox"/> |
| Aufgaben werden nur im Besein des Arztes durchgeführt | <input type="checkbox"/> | <input type="checkbox"/> | <input type="checkbox"/> | <input type="checkbox"/> |
| Andere Form der Delegation.<br>Wenn ja, welche?       | <input type="checkbox"/> | <input type="checkbox"/> | <input type="checkbox"/> | <input type="checkbox"/> |

**Empfinden Sie die Festlegung der delegierbaren Aufgaben als ausreichend rechtlich gesichert?**

- Trifft voll und ganz zu
- Trifft überwiegend zu
- Trifft wenig zu
- Trifft gar nicht zu

Bitte begründen Sie Ihre Wahl:

**Welche Vorteile ergeben sich durch die Mitarbeit der PAs für Ihre Einrichtung?**  
(sollte der Platz nicht ausreichen, verwenden Sie bitte das beigelegte, leere Blatt)

- 1)
- 2)
- 3)
- 4)
- 5)

**Welche Nachteile ergeben sich aus der Mitarbeit der PAs für Ihre Einrichtung?** (sollte der Platz nicht ausreichen, verwenden Sie bitte das beigelegte, leere Blatt)

1)

2)

3)

4)

5)

**Worin sehen Sie die Stärken eines PA in der täglichen Arbeit in Ihrer Einrichtung? (sollte der Platz nicht ausreichen, verwenden Sie bitte das beigegefügte, leere Blatt)**

1)

2)

3)

4)

5)

## Allgemeine Bewertung des Berufsbildes PA

Hier geht es nicht um eine Bewertung Ihrer Mitarbeiterin oder Ihres Mitarbeiters, sondern um Ihre Sicht auf das Berufsbild im Allgemeinen!

|                                                                                                      | Ungenügend               | Mangelhaft               | Zufriedenstellend        | Gut                      | Sehr gut                 |
|------------------------------------------------------------------------------------------------------|--------------------------|--------------------------|--------------------------|--------------------------|--------------------------|
| <b>Mir scheint die fachliche Ausbildung der PAs im Allgemeinen als</b><br>Kommentare:                | <input type="checkbox"/> |
| <b>Ich beurteile die Arbeitsqualität von PAs im Allgemeinen als</b><br>Kommentare:                   | <input type="checkbox"/> |
| <b>Die Akzeptanz der PAs durch andere Mitarbeiter erscheint mir üblicherweise als</b><br>Kommentare: | <input type="checkbox"/> |
| <b>Aus meiner Sicht ist die Einbindung der PAs in den Arbeitsalltag</b><br>Kommentare:               | <input type="checkbox"/> |

**WÜNSCHE/ ERWARTUNGEN AN DIE ENTWICKLUNG DES BERUFSBILDES PA**

Haben Sie Änderungsvorschläge für das PA Studium? Wenn ja, welche? (sollte der Platz nicht ausreichen, verwenden Sie bitte das beigefügte, leere Blatt)

1)

2)

3)

4)

Wenn Sie die Entwicklung des Berufsbildes aktiv mitgestalten könnten, was würden Sie sich wünschen (Bsp.: definierte Aufgabengebiete, klare rechtliche Grundlagen, tarifliche Gehaltsgruppierung etc.)? (sollte der Platz nicht ausreichen, verwenden Sie bitte das beigefügte, leere Blatt)

1)

2)

3)

4)

Können Sie sich vorstellen in Zukunft noch mehr PA Absolventen in Ihrer Einrichtung zu beschäftigen?

 Ja Nein

Bitte

begründen

Sie

Ihre

Wahl:
